# Supplementary material
Source: publisher site journal article supplement (https://www.spandidos-publications.com/5793/downloadSupplementary)

Figure S1. Effect of NE on the proliferation of Huh7 liver cancer cells. After treating Huh7 cells with increasing concentrations of NE for 48 h, cell viability was assessed using an MTT assay. \*\*P<0.01; \*\*\*P<0.001 vs. control group. NE, norepinephrine.

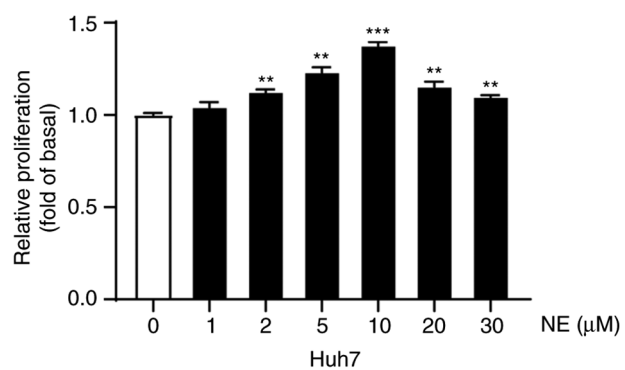

Figure S2.  $\beta$ -AR activation increases PDK1 and AKT phosphorylation in HepG2 cells. (A) HepG2 cells were stimulated with 10  $\mu$ M NE for different lengths of time, and the phosphorylation levels of AKT and PDK1 were detected by western blotting. (B and C) Quantification of the phosphorylation levels of AKT and PDK1. Data are presented as the mean  $\pm$  SEM. \*\*P<0.01; \*\*\*P<0.001 vs. control group.  $\beta$ -AR,  $\beta$ -Adrenergic receptor; NE, norepinephrine; p, phospho.

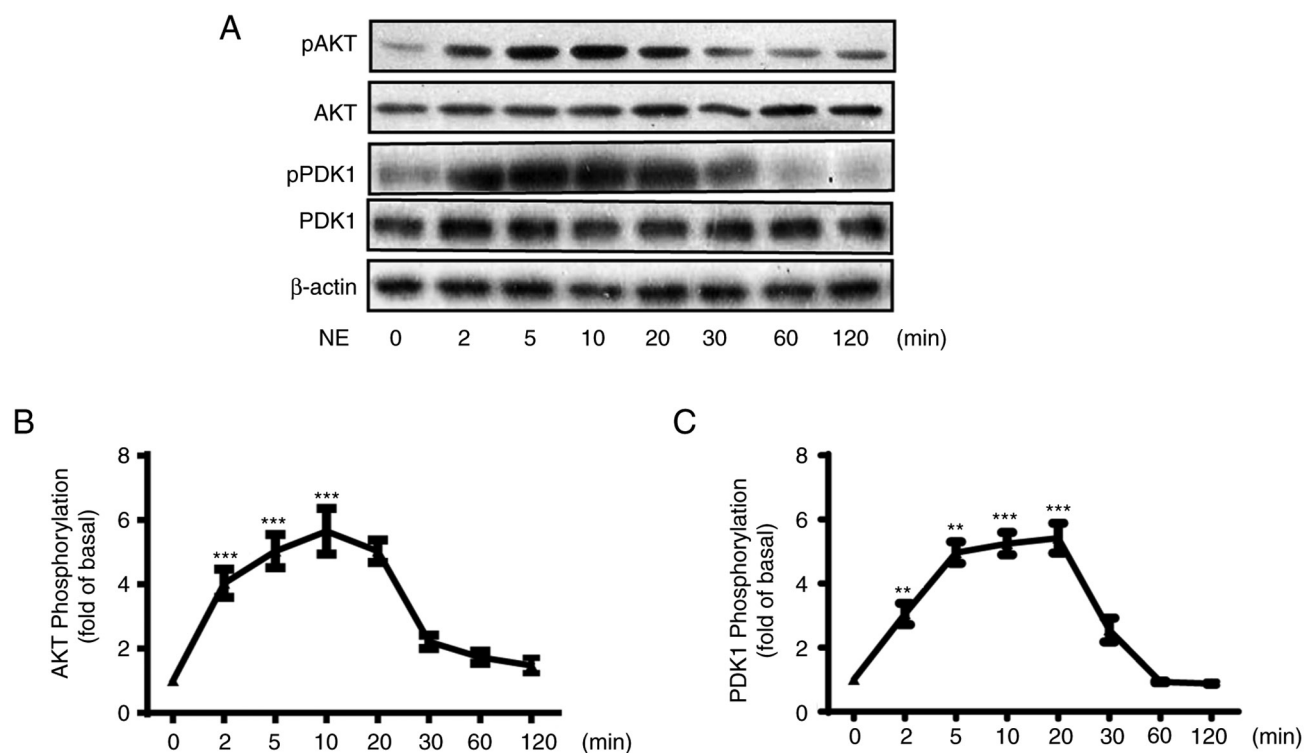

Supplement: Supplementary file 1 [file downloadSupplementary]
